# Supplementary material
Source: publisher figshare collection journal article supplement (https://adisjournals.figshare.com/ndownloader/files/36944131)
Supplement: Supplementary file 1 [file 36944131]

## Phentermine/Topiramate: Adis Evaluation

### Key Points

- A fixed-dose combination of phentermine (sympathomimetic amine) and topiramate being developed by VIVUS (a subsidiary of Icahn Enterprises) for the treatment of obesity, sleep apnoea syndrome, diabetes and NASH
- Received its pediatric first approval on 20 July 2022 in the USA
- Approved, as an adjunct to a reduced-calorie diet and increased physical activity, for chronic weight management in pediatric patients aged  $\geq 12$  years with BMI in the 95th percentile or greater

### Summary

Phentermine/topiramate extended-release capsule (Qsymia®) is a fixed-dose combination of phentermine and topiramate, which is being developed by VIVUS (a subsidiary of Icahn Enterprises) for the treatment of obesity, sleep apnoea syndrome, type 2 diabetes mellitus and non-alcoholic steatohepatitis (NASH).

The once-daily formulation of phentermine (a sympathomimetic amine) and topiramate is designed to combat obesity by decreasing appetite and increasing satiety.

In July 2022, phentermine/topiramate received its first approval in the USA, as an adjunct to a reduced-calorie diet and increased physical activity, for chronic weight management in pediatric patients aged  $\geq 12$  years with BMI in the 95th percentile or greater standardized for age and sex. Phentermine/topiramate is approved in the US and South Korea for obesity in adults. Clinical development of phentermine/topiramate for sleep apnoea syndrome and type-2 diabetes in obese patients and preclinical development for NASH is ongoing in the US.

This summary represents the opinions of the author. For a full list of declarations, including funding and author disclosure statements, please see the full text online. © Springer Nature Switzerland AG 2021.
